# Supplementary material for: Associations of cells from both innate and adaptive immunity with lower nerve conduction velocity: the Maastricht Study
Source: HighWire-hosted journal article supplement (doi:10.1136/bmjdrc-2020-001698), 2021-01-01
Supplement: bmjdrc-2020-001698supp001_data_supplement.pdf [file bmjdrc-2020-001698supp001_data_supplement.pdf]

**Table S1 - Characteristics of the study population based on different nerve conduction velocity (NCV) sum scores**

| Characteristic                          | Outcome 1:<br>Participants with<br>NCV data for at<br>least 2 nerves | Outcome 2:<br>Participants with<br>NCV data<br>for 3 nerves | Outcome 3:<br>Participants with<br>NCV data for<br>motor<br>nerves <sup>a</sup> |
|-----------------------------------------|----------------------------------------------------------------------|-------------------------------------------------------------|---------------------------------------------------------------------------------|
|                                         | N=786                                                                | N=558                                                       | N=739                                                                           |
| Sex, female                             | 408 (51.9%)                                                          | 301 (54.0%)                                                 | 381 (51.6%)                                                                     |
| Age, years                              | 60.2 (8.7)                                                           | 59.1 (8.7)                                                  | 60.2 (8.7)                                                                      |
| BMI, kg/m <sup>2</sup>                  | 26.2 (24.0; 29.4)                                                    | 26.1 (23.9; 29.1)                                           | 26.2 (24.0; 29.5)                                                               |
| Waist circumference, cm                 | 94.4 (85.6; 102.6)                                                   | 93.7 (84.5; 102.0)                                          | 94.5 (85.9; 102.8)                                                              |
| HbA1c, mmol/mol                         | 37 (34; 43)                                                          | 37 (34; 43)                                                 | 37 (34; 44)                                                                     |
| Glucose metabolism status, n (%)        |                                                                      |                                                             |                                                                                 |
| Normal                                  | 444 (56.6%)                                                          | 325 (58.3%)                                                 | 412 (55.8%)                                                                     |
| Prediabetes                             | 108 (13.7%)                                                          | 76 (13.6%)                                                  | 101 (13.7%)                                                                     |
| Type 2 diabetes                         | 231 (29.4%)                                                          | 154 (27.7%)                                                 | 223 (30.2%)                                                                     |
| Other diabetes types                    | 2 (0.3%)                                                             | 2 (0.4%)                                                    | 2 (0.3%)                                                                        |
| Total cholesterol, mmol/l               | 5.2 (1.1)                                                            | 5.2 (1.1)                                                   | 5.1 (1.1)                                                                       |
| Triglycerides, mmol/l                   | 1.2 (0.9; 1.7)                                                       | 1.2 (0.9; 1.6)                                              | 1.2 (0.9; 1.7)                                                                  |
| eGFR, ml/min/1.73m <sup>2</sup>         | 84.1 (73.5; 93.3)                                                    | 84.9 (75.4; 94.0)                                           | 84.1 (73.6; 93.3)                                                               |
| Hypertension, n (%)                     | 535 (68.1%)                                                          | 379 (68.0%)                                                 | 507 (68.7%)                                                                     |
| History of CVD, n (%)                   | 146 (18.6%)                                                          | 99 (17.8%)                                                  | 137 (18.6%)                                                                     |
| Smoking, n (%)                          |                                                                      |                                                             |                                                                                 |
| Never                                   | 302 (38.5%)                                                          | 229 (41.2%)                                                 | 285 (38.7%)                                                                     |
| Former                                  | 371 (47.3%)                                                          | 250 (44.9%)                                                 | 349 (47.3%)                                                                     |
| Current                                 | 111 (14.2%)                                                          | 77 (13.8%)                                                  | 103 (13.9%)                                                                     |
| Alcohol consumption, n (%) <sup>b</sup> |                                                                      |                                                             |                                                                                 |
| None                                    | 168 (21.4%)                                                          | 120 (21.6%)                                                 | 156 (21.2%)                                                                     |
| Low                                     | 441 (56.2%)                                                          | 311 (55.9%)                                                 | 417 (56.6%)                                                                     |
| High                                    | 175 (22.3%)                                                          | 125 (22.5%)                                                 | 164 (22.2%)                                                                     |
| Glucose-lowering drugs, n (%)           | 174 (22.2%)                                                          | 113 (20.3%)                                                 | 167 (22.6%)                                                                     |
| Lipid-lowering drugs, n (%)             | 275 (35.0%)                                                          | 193 (34.6%)                                                 | 268 (36.3%)                                                                     |
| Antihypertensive drugs, n (%)           | 308 (39.2%)                                                          | 206 (36.9%)                                                 | 295 (39.9%)                                                                     |
| NSAIDs, n (%)                           | 67 (8.5%)                                                            | 44 (7.9%)                                                   | 62 (8.4%)                                                                       |

Continuous data are given as mean (SD) or median (interquartile range). Categorical variables are given as numbers and percentages (%).

BMI, body mass index; CVD, cardiovascular diseases; eGFR, estimated glomerular filtration rate; NCV, nerve conduction velocity; NSAIDs, nonsteroidal anti-inflammatory drugs; SD, standard deviation.

<sup>a</sup> Motor nerves include the peroneal and the tibial nerves.

<sup>b</sup> None as 0 glasses/week; low as  $\leq 7$  glasses/week for women and  $\leq 14$  glasses/week for men; high as  $> 7$  glasses/week for women and  $> 14$  glasses/week for men.

Missing values: sex (N=1); age (N=1); BMI (N=1); waist circumference (N=1); HbA1c (N=1); glucose metabolism status (N=1); total cholesterol (N=1); triglycerides (N=1); hypertension (N=1); history of CVD (N=3); smoking (N=2); alcohol consumption (N=2); glucose-lowering drugs (N=1); lipid-lowering drugs (N=1); antihypertensive drugs (N=1); NSAIDs (N=1).
