# Supplementary material for: Associations of cells from both innate and adaptive immunity with lower nerve conduction velocity: the Maastricht Study
Source: HighWire-hosted journal article supplement (doi:10.1136/bmjdrc-2020-001698), 2021-01-01
Supplement: bmjdrc-2020-001698supp005_data_supplement.pdf [file bmjdrc-2020-001698supp005_data_supplement.pdf]

**Figure S1 - Gating strategy of the flow cytometry analysis.**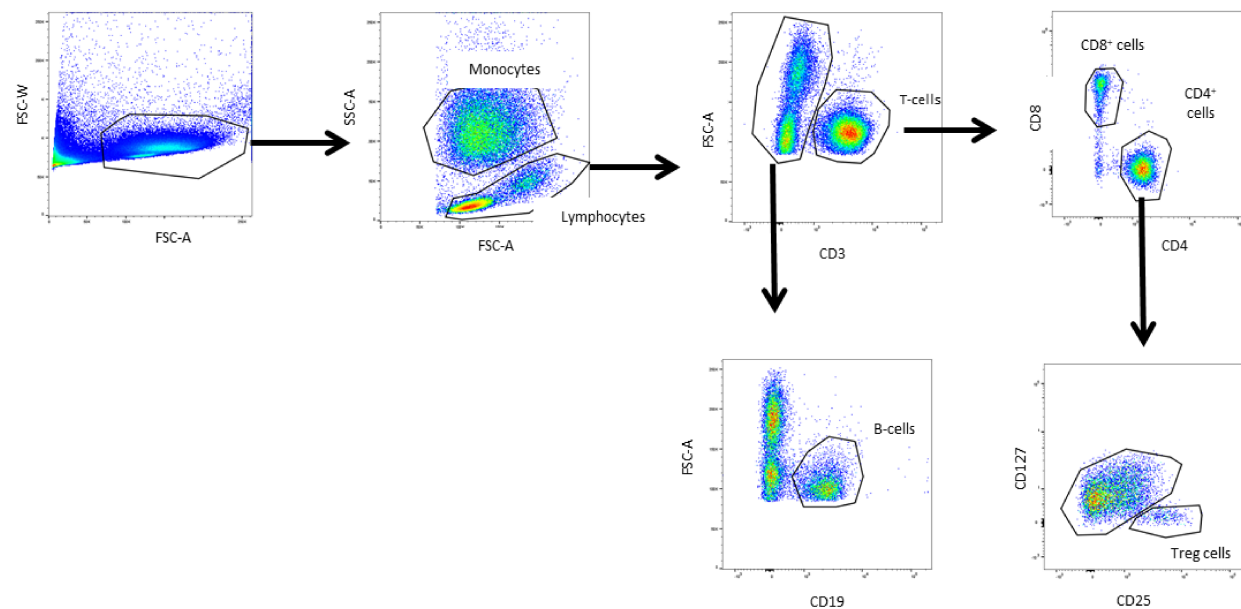

Monocytes and lymphocytes were gated based on forward and side scatter plots. Among CD3-negative cells, B cells were identified based on CD19 expression. T cells were identified by CD3 expression. From total T cells, CD8<sup>+</sup> T cells were identified based on CD8 expression while CD4<sup>+</sup> T cells were identified based on CD4 expression. Regulatory T cells (Treg) were identified from CD4<sup>+</sup> T cells by low expression of CD127 and high expression of CD25.
